# Supplementary material for: Stability, electronic structure and magnetic properties of vacancy and nonmetallic atom-doped buckled arsenene: first-principles study
Source: Royal Society of Chemistry journal article supplement (doi:10.1039/c6ra00032k), 2016-01-01
Supplement: c6ra00032k11.pdf [file c6ra00032k11.pdf]

## Electronic Supplementary Information

### Stability, electronic structure and magnetic properties of vacancy and nonmetallic atoms doped buckled arsenene: First-Principles Study

Chunyan Xu, Mingfeng Zhu, Huiling Zheng, Xiaobo Du, Wenquan Wang and  
Yu Yan\*

Key Laboratory of Physics and Technology for Advanced Batteries (Ministry of Education),  
Department of Physics, Jilin University, Changchun 130012, China

E-mail: HYPERLINK "mailto:yanyu@jlu.edu.cn"

[yanyu@jlu.edu.cn](mailto:yanyu@jlu.edu.cn)

#### ***MD movies of As<sub>49</sub> and As<sub>49</sub>X (X= H, F, B, N, P, C, Si, O and S) at 300K.***

- As49.wmv represents the As<sub>49</sub> at T=300K.
- AsH.wmv represents the As<sub>49</sub>H at T=300K.
- AsF.wmv represents the As<sub>49</sub>F at T=300K.
- AsB.wmv represents the As<sub>49</sub>B at T=300K.
- AsN.wmv represents the As<sub>49</sub>N at T=300K.
- AsP.wmv represents the As<sub>49</sub>P at T=300K.
- AsC.wmv represents the As<sub>49</sub>C at T=300K.
- AsSi.wmv represents the As<sub>49</sub>Si at T=300K.
- AsO.wmv represents the As<sub>49</sub>O at T=300K.
- AsS.wmv represents the As<sub>49</sub>S at T=300K.

---

\* Corresponding author. E-mail address: [yanyu@jlu.edu.cn](mailto:yanyu@jlu.edu.cn) (Yu Yan).
